# Supplementary material for: Characterization of the blood–brain barrier in genetically diverse laboratory mouse strains
Source: PubMed Central journal article supplement (PMC8317333; doi:10.1186/s12987-021-00269-w), 2021-07-28

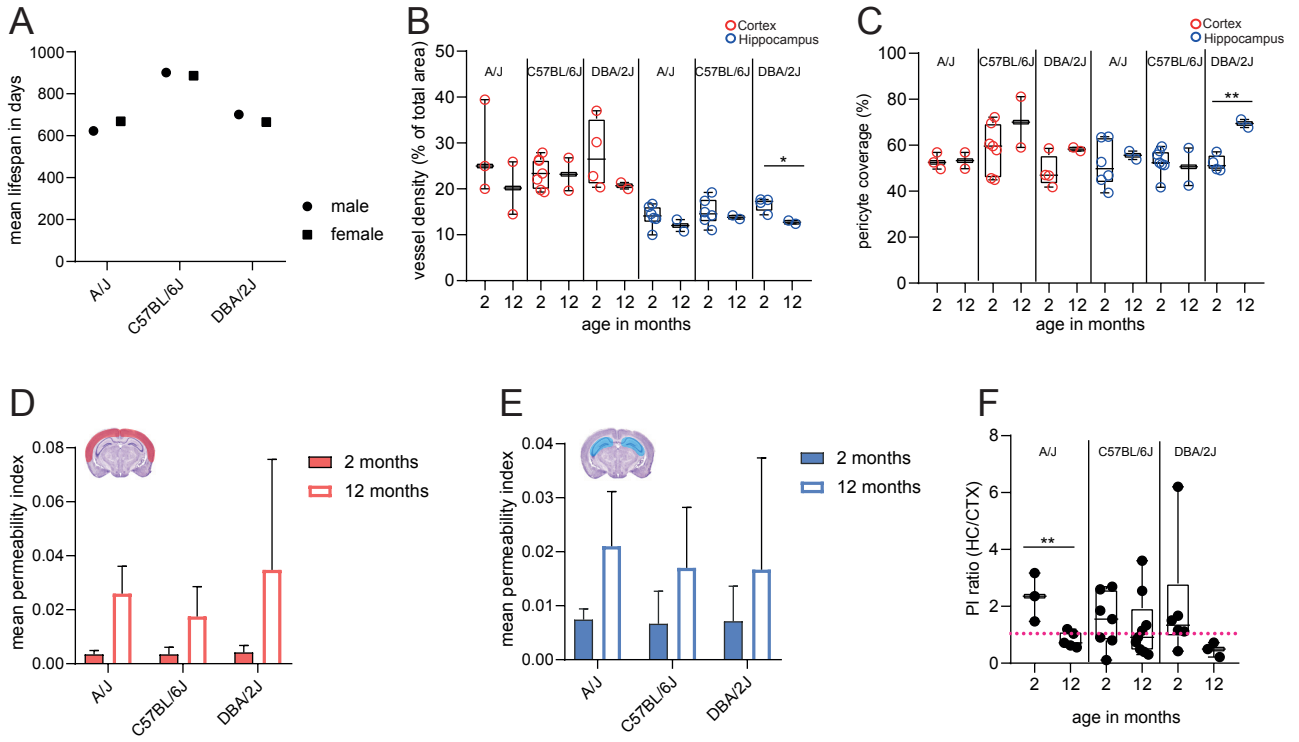

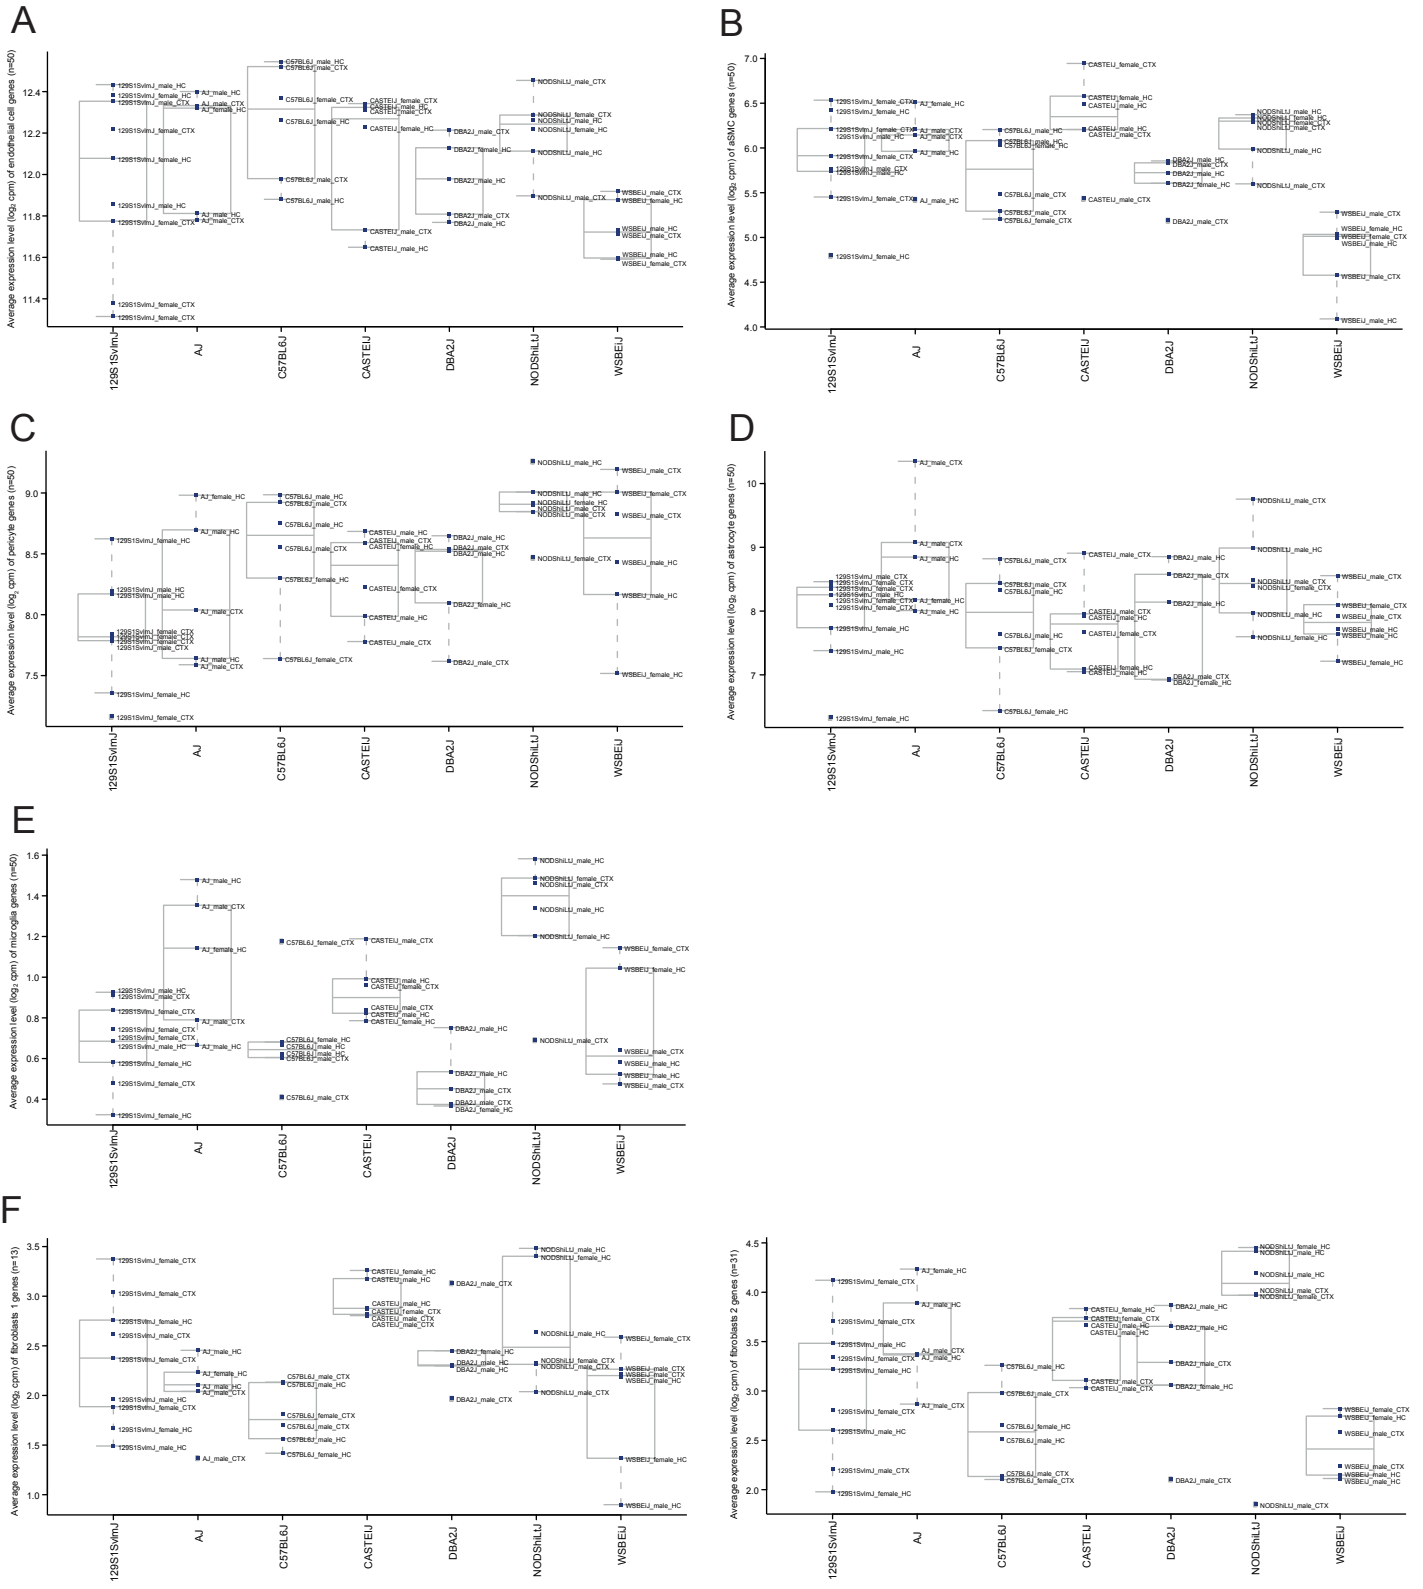

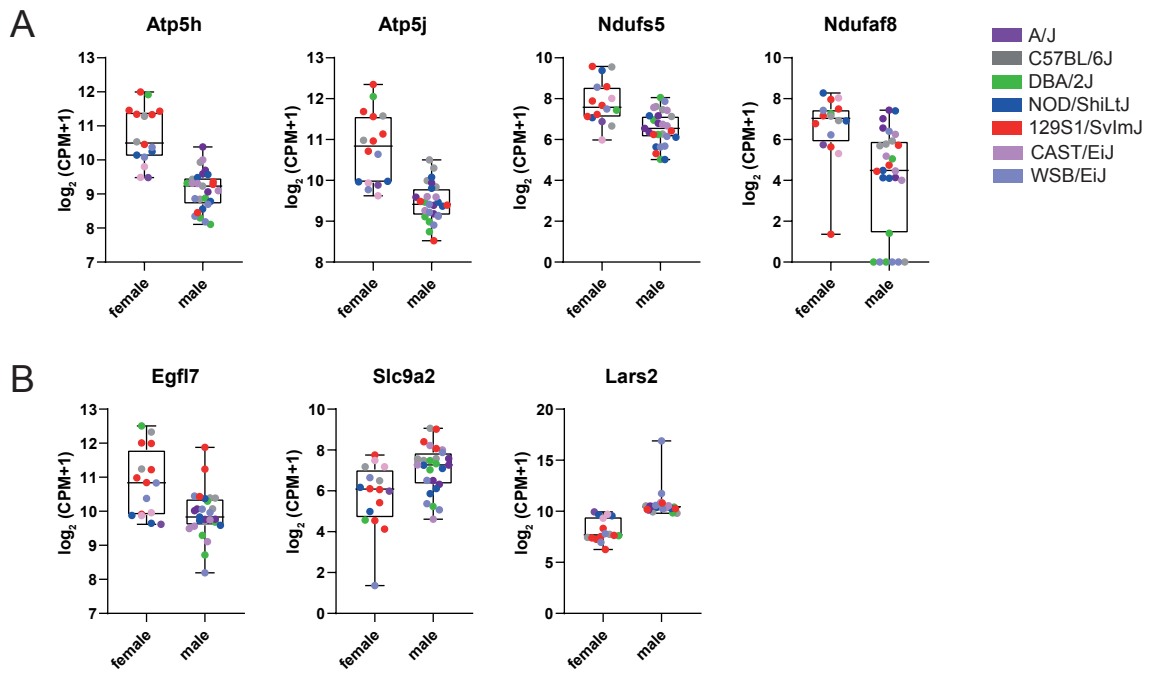

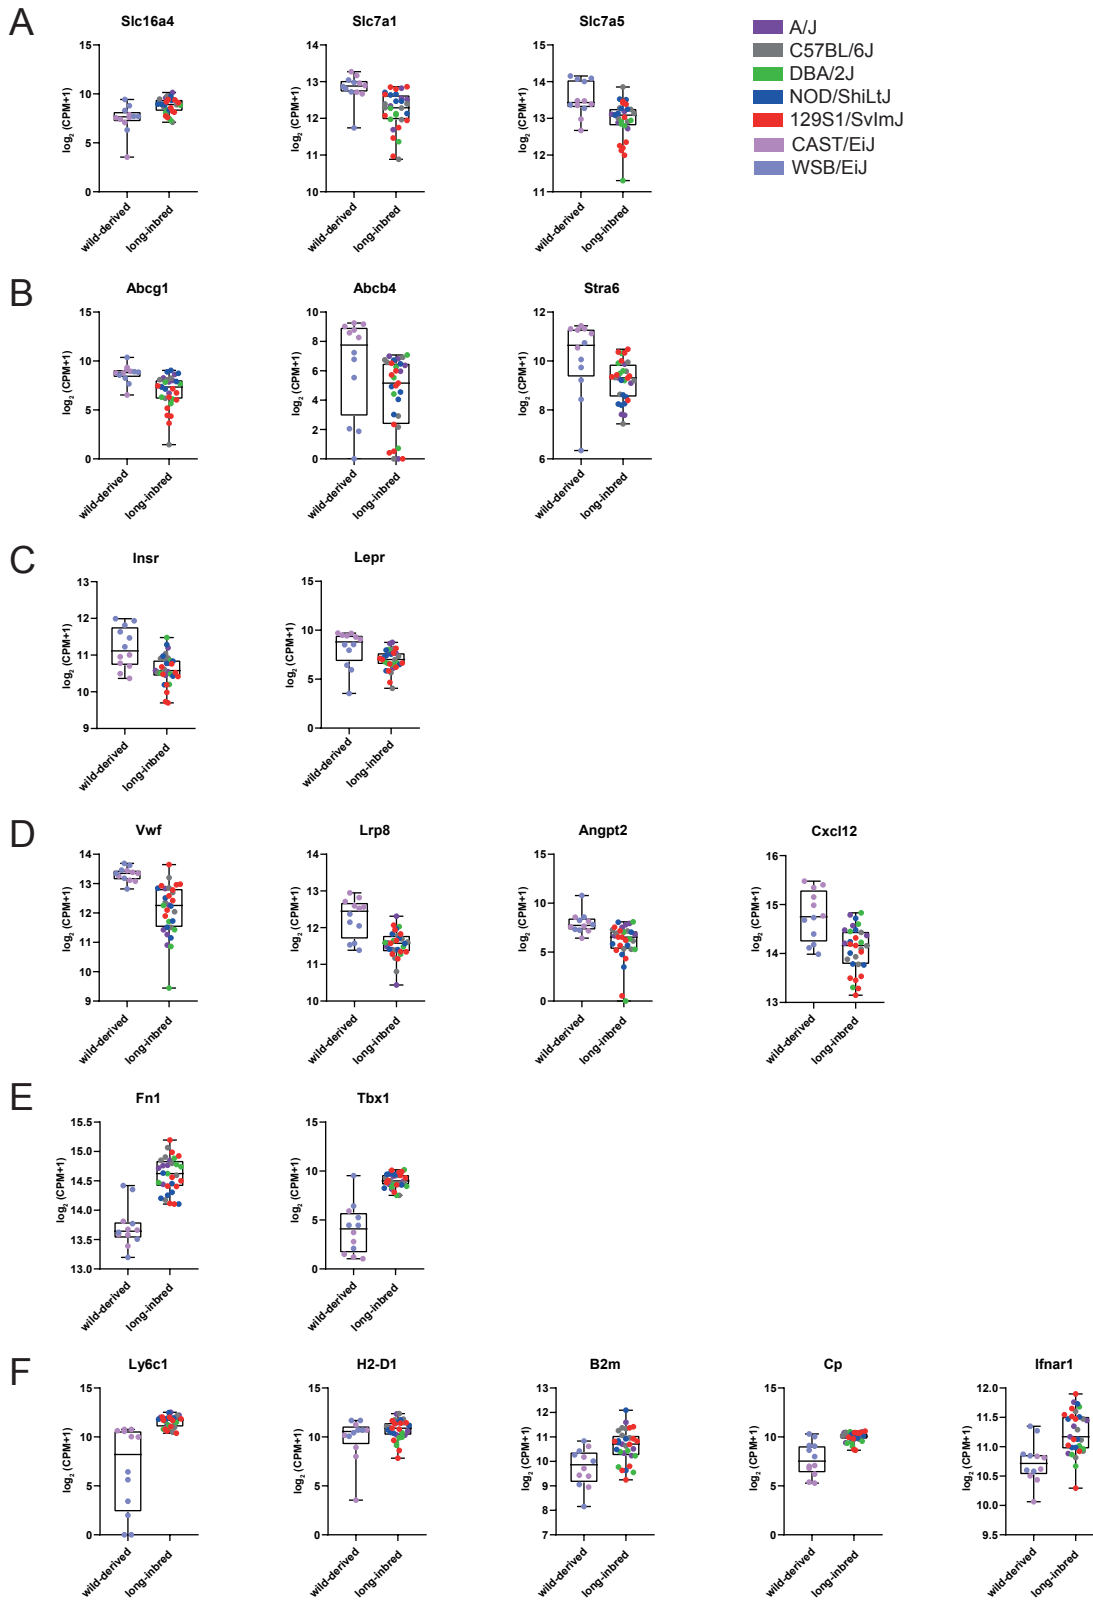

Supplement: 12987_2021_269_MOESM1_ESM.pdf [file 12987_2021_269_MOESM1_ESM.pdf]
